# Supplementary material for: Identification of MicroRNA for Intermuscular Bone Development in Blunt Snout Bream (Megalobrama amblycephala)
Source: MDPI journal article supplement (doi:10.3390/ijms160510686), 2015-05-11
Supplement: s1 [file s1]

# Supplementary Information

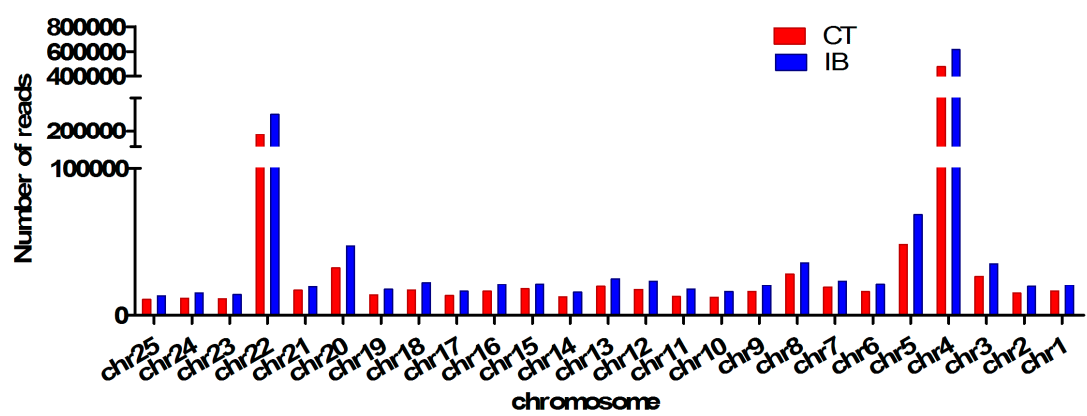

**Figure S1.** Number and distribution of clean reads mapped to the genome sequence of zebrafish.

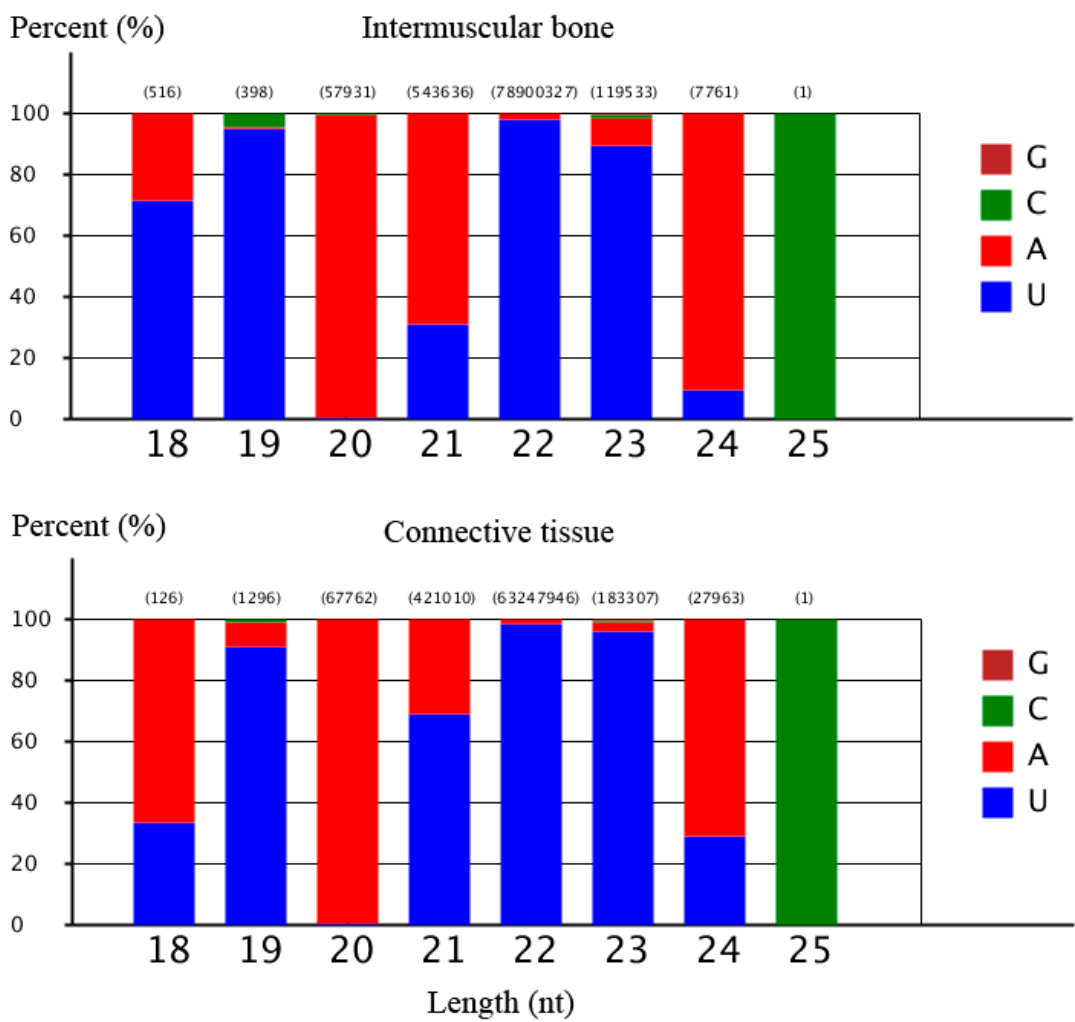

**Figure S2.** First nucleotide bias of 18~25 nt sRNA tags. The numbers above the histogram stand for the tags count in total. Each color in the figure shows the sRNA tags whose first base is a certain base.

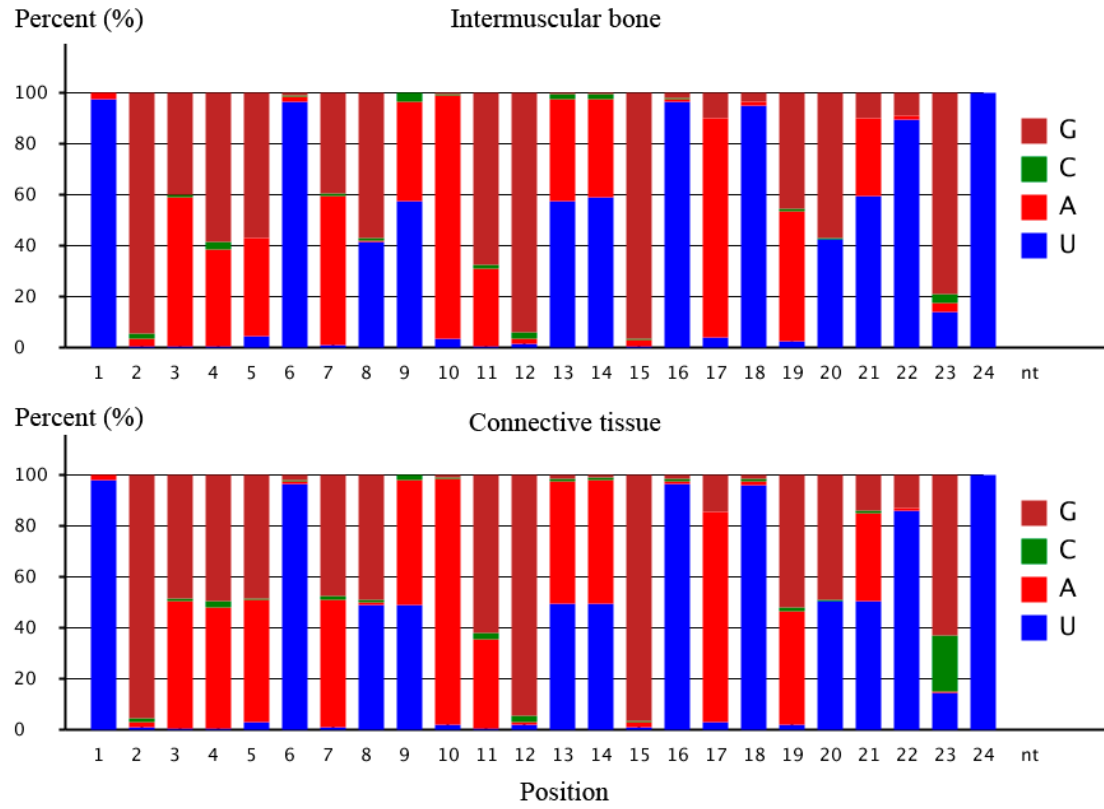

**Figure S3.** Base bias of the known miRNAs of intermuscular bone and connective tissue in *M. amblycephala* at each position.
